# Supplementary material for: Anti-filarial efficacy of Centratherum anthelminticum : unravelling the underlying mechanisms through biochemical, HRAMS proteomics and MD simulation approaches
Source: Royal Society of Chemistry journal article supplement (doi:10.1039/d4ra03461a), 2024-01-01
Supplement: d4ra03461a1.pdf [file d4ra03461a1.pdf]

## Supplementary information's

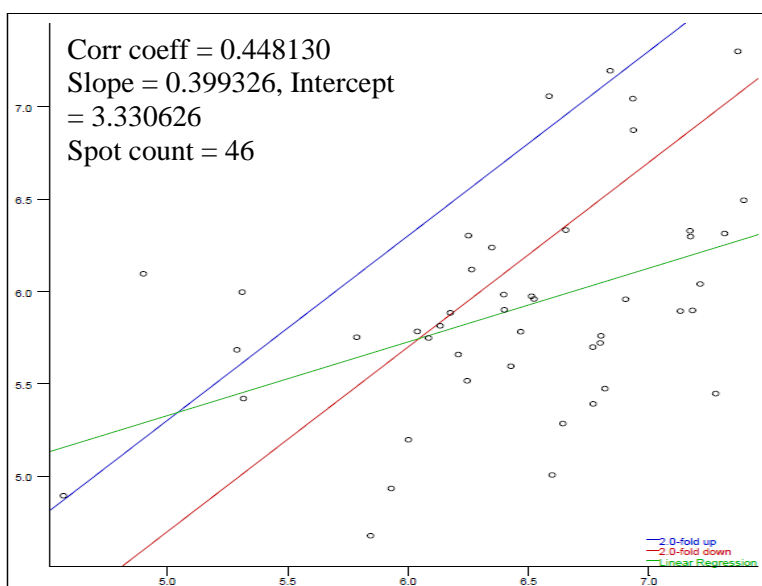

Figure 1. Correlation graph of spot matching. Analysis of protein spots in the homogenate of adult female parasites after the treatment of CA extract.

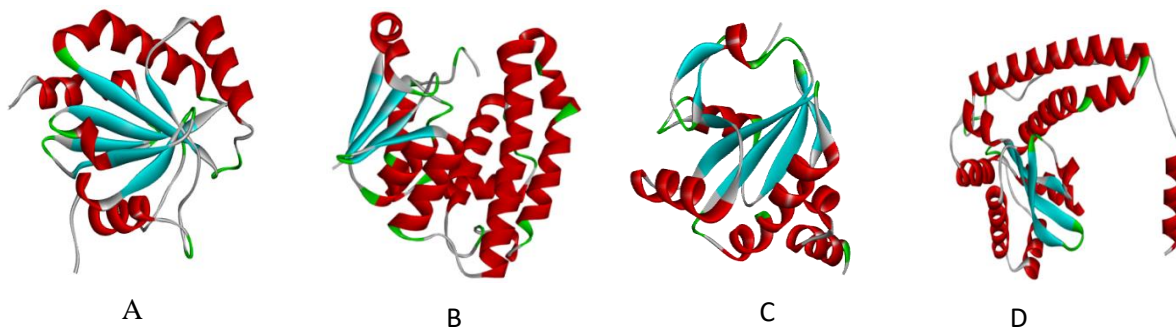

Figure 2. Three dimensional (3D) models of Anti-oxidant proteins (A) Glutathione peroxidase, (B) Glutathione-S-Transferase, (C) Thioredoxin transferase and (D) Superoxide dismutase.

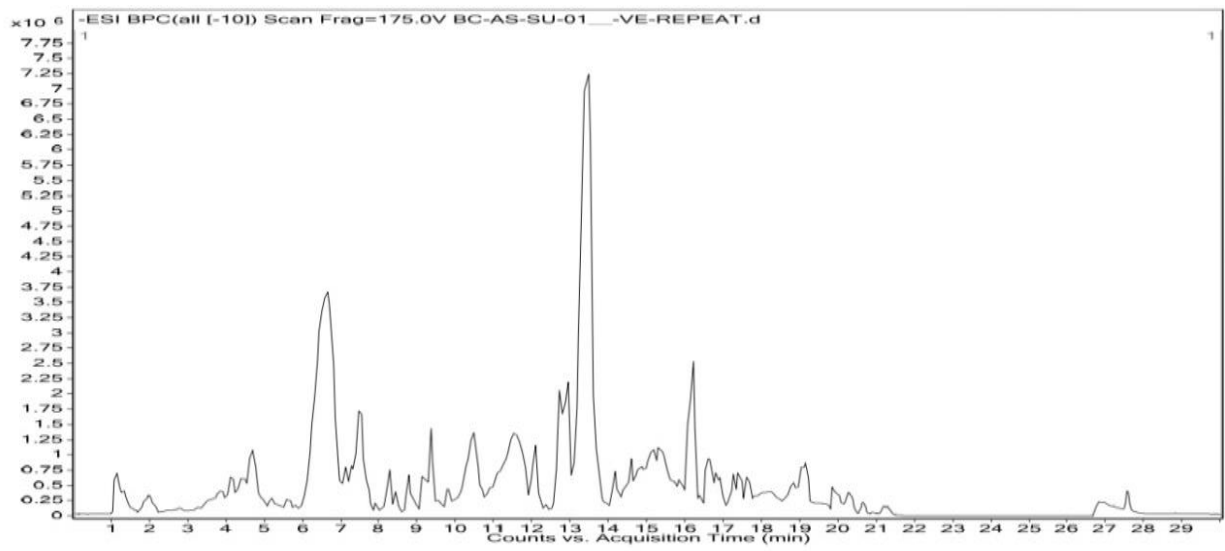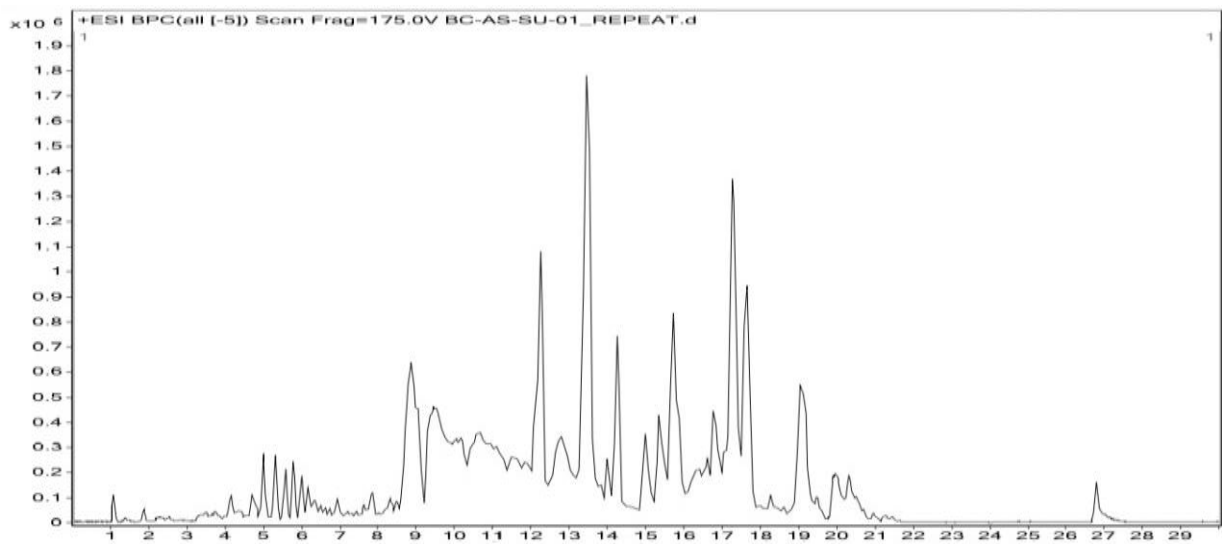

Figure 3. LC-MS of *Centratherum anthelminticum* ethanol seed extract, 30 minutes runs.

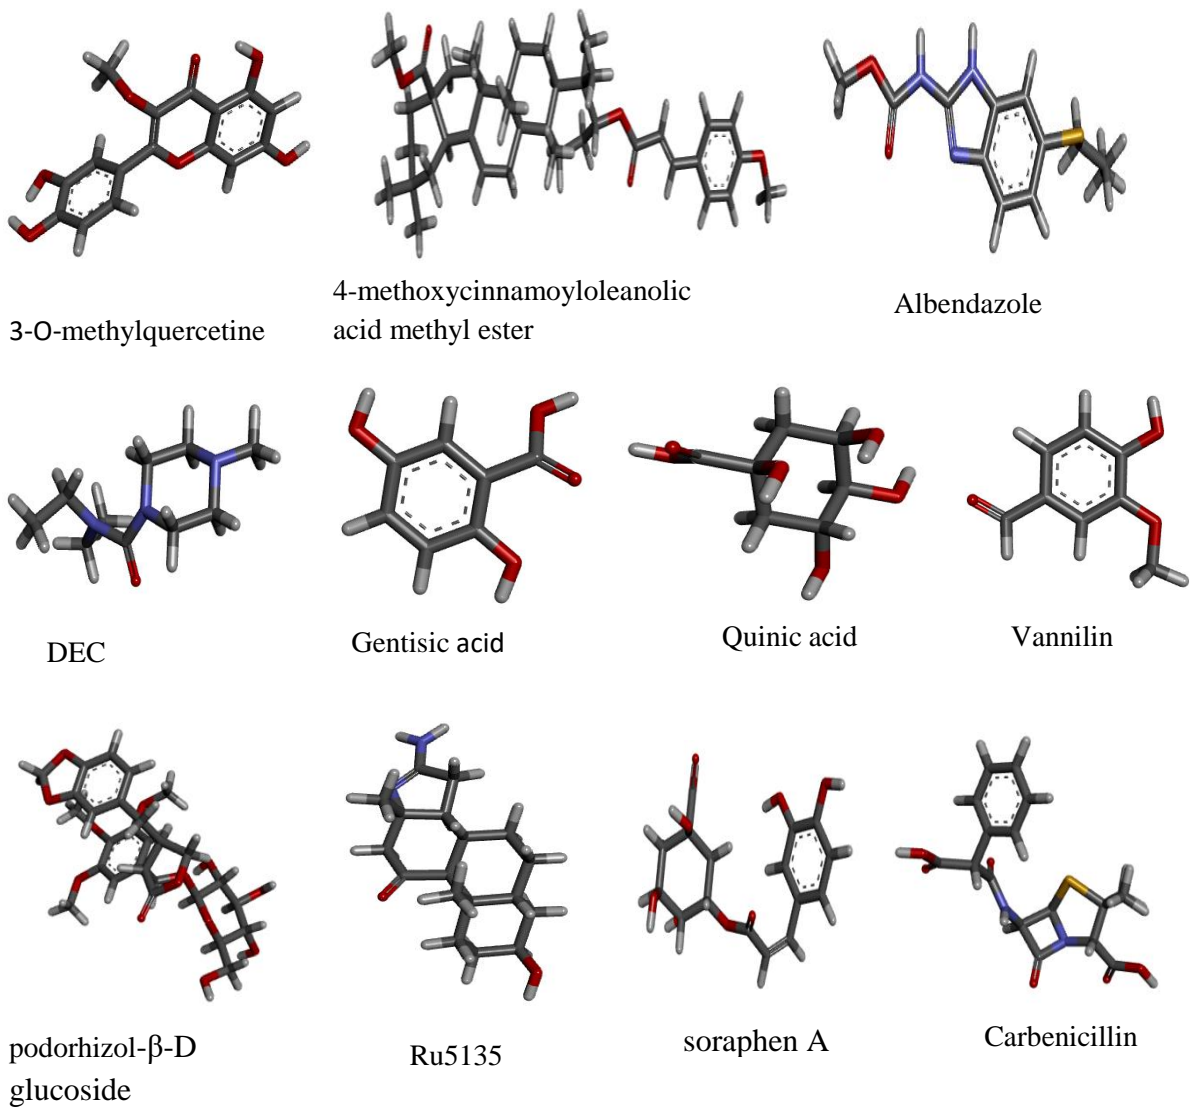

Figure 3. Three dimensional structures of CA bioactive compounds, i.e. selected for *in-silico* studies.

Table 1. Evaluating the accuracy of predicted protein structure of targeted filarial antioxidant proteins/enzymes models

| <b>Ramachandran plot analysis</b> |                             |                                   |                                   |                           |                                             |                                             |                                             |
|-----------------------------------|-----------------------------|-----------------------------------|-----------------------------------|---------------------------|---------------------------------------------|---------------------------------------------|---------------------------------------------|
| <b>ProCheck server</b>            |                             |                                   |                                   | <b>RAMPAGE server</b>     |                                             |                                             |                                             |
| <b>Target protein</b>             | <b>Most favored regions</b> | <b>Additional allowed regions</b> | <b>Generously allowed regions</b> | <b>Disallowed regions</b> | <b>Number of residues in favored region</b> | <b>Number of residues in allowed region</b> | <b>Number of residues in outlier region</b> |
| GPx                               | 134(93.1%)                  | 10(6.9%)                          | 0 (0.0%)                          | 0 (0.0%)                  | 153(93.0%)                                  | 10(7%)                                      | 0 (0.0%)                                    |

### Hydrogen bond statistics

| <b>Target Protein</b> | <b>Mean H-bond distance</b> |                 | <b>Mean H-bond energy</b> |                 | <b>Residue with H-bond</b> |                 |
|-----------------------|-----------------------------|-----------------|---------------------------|-----------------|----------------------------|-----------------|
|                       | <b>Observed</b>             | <b>Expected</b> | <b>Observed</b>           | <b>Expected</b> | <b>Observed</b>            | <b>Expected</b> |
| GPx                   | 2.2 (sd=0.3)                | 2.2 (sd= 0.4)   | -1.7<br>(sd=1.0)          | -2.0 (sd=0.8)   | 348 (77%)                  | 336 (75%)       |

Table 2A. Molecular Screening of negative LC-MS compounds by CA using PyRx (AutoDock Vina) and PatchDock server with Superoxide dismutase

| <b>S.N.</b> | <b>Ligand</b>                                 | <b>Binding Affinity</b> | <b>Score</b> | <b>Area</b> | <b>ACE</b> |
|-------------|-----------------------------------------------|-------------------------|--------------|-------------|------------|
| 1           | 2-Acetylthiophene                             | -3.7                    | 2166         | 226.6       | 81.85      |
| 2           | 3-acetyl-6-methoxybenzaldehyde                | -4.6                    | 2978         | 335.5       | -3.4       |
| 3           | 3-Methylindolepyruvate                        | -5.5                    | 2818         | 326.4       | 9.33       |
| 4           | 3-O-Methylquercetin                           | -6.2                    | 3352         | 415.4       | -111.54    |
| 5           | 4-Dodecylbenzenesulfonic                      | -5.7                    | 4658         | 502.5       | -130.19    |
| 6           | 4-Methoxycinnamoyloleanolic acid methyl ester | -8.3                    | 5480         | 629.9       | -50.26     |
| 8           | Annotemoyin 1                                 | -4.5                    | 5658         | 756.5       | -256.21    |
| 9           | Ascorbyl stearate                             | -4.9                    | 5266         | 591.7       | -72.7      |
| 10          | Avocadene_2-acetate                           | -4.6                    | 4758         | 522         | -66.19     |
| 11          | Beta-Obscurine                                | -6.7                    | 2968         | 320.6       | 29.8       |
| 12          | Carbenicillin                                 | -6.2                    | 3934         | 475.5       | -212.64    |
| 13          | 3-Carboxyethenyl-3,5-cyclohexadiene-1,2-diol  | -5.1                    | 2686         | 291         | 5.38       |
| 14          | Dibutyl decanedioate                          | -4.2                    | 4650         | 533.6       | -60.19     |
| 15          | Flavine mononucleotide (FMN)                  | -6.4                    | 4378         | 470         | -121.8     |
| 16          | Gentisic acid                                 | -4.9                    | 2282         | 252.3       | 6.44       |
| 17          | PG(161(9Z)160)                                | -4.5                    | 7084         | 907.5       | -76.03     |

|    |                             |      |      |       |         |
|----|-----------------------------|------|------|-------|---------|
| 18 | Podorhizol beta-D-glucoside | -6.0 | 4704 | 533.2 | -79.67  |
| 19 | Quinic acid                 | -5.7 | 2316 | 255.9 | 37.02   |
| 20 | RU 5135                     | -6.5 | 3154 | 361.9 | -100.79 |
| 21 | Soraphen A                  | -5.8 | 3588 | 420.3 | -82.71  |
| 22 | DEC                         | -3.9 | 2936 | 342.3 | -4.55   |
| 23 | Vernodalin                  | -6.4 | 3766 | 437.6 | -164.44 |
| 24 | Ivermectin                  | -8.7 | 6912 | 891.7 | -217.45 |
| 25 | Albendazole                 | -5.0 | 3648 | 413.9 | -109.75 |

Table- 2B Molecular Screening of negative LC-MS compounds by CA using PyRx (AutoDock Vina) and PatchDock server with Thioredoxin

| S.N. | Ligand                                        | Binding Affinity | Score | Area  | ACE     |
|------|-----------------------------------------------|------------------|-------|-------|---------|
| 1    | 2-Acetylthiophene                             | -3.9             | 2062  | 208.8 | -120.34 |
| 2    | 3-acetyl-6-methoxybenzaldehyde                | -5.3             | 2704  | 292.3 | -113    |
| 3    | 3-Methylindolepyruvate                        | -6.3             | 2784  | 295.4 | -104.09 |
| 4    | 4-Dodecylbenzenesulfonic acid                 | -5.4             | 3498  | 384.2 | -184.9  |
| 5    | 3-O-Methylquercetin                           | -6.7             | 3920  | 423.6 | -177.16 |
| 6    | 4-Methoxycinnamoyloleanolic acid methyl ester | -7.6             | 5324  | 587.3 | 2.92    |
| 8    | Annotemoyin 1                                 | -6.3             | 4392  | 520.6 | -108.46 |
| 9    | Ascorbyl stearate                             | -5.3             | 4582  | 586.4 | -33.46  |
| 10   | Avocadene 2-acetate                           | -4.9             | 4322  | 481.1 | -52.61  |
| 13   | Beta-Obscurine                                | -6.9             | 2994  | 331.7 | -50.98  |
| 12   | Carbenicillin                                 | -6.9             | 3992  | 454.3 | -163.83 |
| 13   | 3-Carboxyethenyl-3,5-cyclohexadiene-1,2-diol  | -5.5             | 2582  | 270.1 | -108.41 |
| 14   | Dibutyl decanedioate                          | -5.2             | 4226  | 523.3 | -56.34  |
| 15   | Gentsic acid                                  | -5.5             | 4290  | 493.8 | -8.56   |
| 16   | Flavine mononucleotide (FMN)                  | -7.5             | 2164  | 265.3 | -12.96  |
| 17   | PG(161(9Z)160)                                | -4.9             | 5960  | 754.3 | -116.92 |
| 18   | Podorhizol beta-D-glucoside                   | -6.7             | 4668  | 542.7 | -138.9  |
| 19   | Quinic acid                                   | -5.3             | 2208  | 227   | -80.32  |
| 20   | RU 5135                                       | -7.2             | 3432  | 377.5 | -45.57  |
| 21   | Soraphen A                                    | -6.7             | 3520  | 383.7 | -117.43 |
| 22   | DEC                                           | -4.6             | 3000  | 320.2 | -95.42  |
| 23   | Ivermectin                                    | -7.5             | 3894  | 440.4 | -32.07  |
| 24   | Vernodalin                                    | -6.6             | 6786  | 874.9 | -143.65 |
| 25   | Albendazole                                   | -5.7             | 3374  | 363.3 | -98.38  |

Table 2C. Molecular Screening of negative LC-MS compounds by CA using PyRx (AutoDock Vina) and PatchDock server with Glutathione-S-Transferase

| S.N. | Ligand                                        | Binding Affinity | Score | Area  | ACE     |
|------|-----------------------------------------------|------------------|-------|-------|---------|
| 1    | 2-Acetylthiophene                             | -4.6             | 2666  | 295   | -123.3  |
| 2    | 3-acetyl-6-methoxybenzaldehyde                | -5               | 3268  | 408.9 | -105.3  |
| 3    | 3-Methylindolepyruvate                        | -6.2             | 3196  | 414   | -144.16 |
| 4    | 3-O-Methylquercetin                           | -6.7             | 3746  | 450.5 | -97.94  |
| 5    | 4-Dodecylbenzenesulfonic acid                 | -5.5             | 4614  | 505.2 | -110.4  |
| 6    | 4-Methoxycinnamoyloleanolic acid methyl ester | acid -8.8        | 5830  | 848.9 | -68.31  |
| 8    | Annotemoyin 1                                 | -6.4             | 5688  | 659.6 | -89.5   |
| 9    | Ascorbyl stearate                             | -4.6             | 5406  | 657.9 | 81.08   |
| 10   | Avocadene 2-acetate                           | -4.8             | 4766  | 642.6 | -67.44  |
| 11   | beta-Obscurine                                | -6.9             | 3288  | 500.5 | -176.07 |
| 12   | Carbenicillin                                 | -6.6             | 4260  | 493.5 | -79.17  |
| 13   | 3-Carboxyethenyl-3,5-cyclohexadiene-1,2-diol  | 5.1              | 3054  | 373.1 | -79.17  |
| 14   | Dibutyl decanedioate                          | -4.4             | 4870  | 593.8 | -96.45  |
| 15   | Flavine mononucleotide (FMN)                  | -7.1             | 4710  | 506.7 | -134.78 |
| 16   | Gentisic acid                                 | -5.5             | 2706  | 305.3 | -86.24  |
| 17   | PG(161(9Z)160)                                | -5.5             | 7192  | 884.6 | -81.29  |
| 18   | Podorhizol beta-D-glucoside                   | -7.5             | 4802  | 599.3 | -138.33 |
| 19   | Quinic acid                                   | -5.1             | 2790  | 327.7 | -84.51  |
| 20   | RU 5135                                       | -6.8             | 3488  | 492.5 | -192.03 |
| 21   | Soraphen A                                    | -6.7             | 3730  | 486   | -109.89 |
| 22   | Ivermectin                                    | -8.9             | 7318  | 935.7 | -205.6  |
| 23   | DEC                                           | -4.3             | 3314  | 414.1 | -151.1  |
| 24   | Vernodalin                                    | -6.8             | 3930  | 430.4 | -138.6  |
| 25   | Albendazole                                   | -5.5             | 3540  | 466.6 | -140.15 |

Table 2D. Molecular Screening of negative LC-MS compounds by CA using PyRx (AutoDock Vina) and PatchDock server with Glutathione Peroxidase

| S.N. | Ligand                                        | Binding Affinity | Score | Area   | ACE     |
|------|-----------------------------------------------|------------------|-------|--------|---------|
| 1    | 2-Acetylthiophene                             | -3.8             | 2808  | 292.70 | -148.16 |
| 2    | 3-acetyl-6-methoxybenzaldehyde                | -4.9             | 3084  | 378.00 | -163.28 |
| 3    | 3-Methylindolepyruvate                        | -5.1             | 3556  | 417.10 | -200.04 |
| 4    | 3-O-Methylquercetin                           | -5.9             | 3864  | 500.00 | -243.56 |
| 5    | 4-Dodecylbenzenesulfonic acid                 | -5.3             | 4520  | 567.80 | -306.45 |
| 6    | 4-Methoxycinnamoyloleanolic acid methyl ester | acid -7.6        | 5448  | 647.70 | -174.14 |
| 8    | Annotemoyin 1                                 | -5.1             | 5624  | 733.10 | -194.98 |
| 9    | Ascorbyl stearate                             | -4.3             | 5490  | 807.30 | -322.08 |

|    |                                              |      |      |        |         |
|----|----------------------------------------------|------|------|--------|---------|
| 10 | Avocadene 2-acetate                          | -4.5 | 4700 | 634.50 | -240.66 |
| 11 | beta-Obscurine                               | -5.9 | 4362 | 524.40 | -208.93 |
| 12 | Carbenicillin                                | -5.4 | 4542 | 590.10 | -332.63 |
| 13 | 3-Carboxyethenyl-3,5-cyclohexadiene-1,2-diol | -4.9 | 3066 | 382.00 | -138.69 |
| 14 | Dibutyl decanedioate                         | -3.9 | 4732 | 648.20 | -219.66 |
| 15 | Flavine mononucleotide (FMN)                 | -5.4 | 5034 | 669.50 | -272.01 |
| 16 | Gentisic acid                                | -5.2 | 3010 | 310.50 | -125.61 |
| 17 | PG(161(9Z)160)                               | -3.6 | 6744 | 908.00 | -227.14 |
| 18 | Podorhizol beta-D-glucoside                  | -6.0 | 5060 | 748.80 | -430.03 |
| 19 | Quinic acid                                  | -5.2 | 3066 | 322.40 | -115.59 |
| 20 | RU 5135                                      | -6.1 | 3934 | 491.10 | -254.34 |
| 21 | Soraphen A                                   | -5.6 | 4328 | 559.90 | -226.38 |
| 22 | Ivermectin                                   | -7.6 | 7100 | 897.90 | -278.94 |
| 23 | DEC                                          | -3.8 | 3708 | 454.50 | -212.10 |
| 24 | Vernodalin                                   | -6.2 | 7100 | 897.90 | -278.94 |
| 25 | Albendazole                                  | -4.9 | 3698 | 397.90 | -165.80 |

Table 4. Drug likeness properties of CA bioactive compounds

| Drug Name                                        | PubChen<br>CID | Molecular<br>Weight g/mol | LogP value | H-bond<br>Donor | H-bond<br>Acceptor | Molar<br>Refractivity |
|--------------------------------------------------|----------------|---------------------------|------------|-----------------|--------------------|-----------------------|
| 3-O-Methylquercetin                              | 5280681        | 316.00                    | 2.099299   | 4               | 7                  | 78.430                |
| 4-Methoxycinnamoyloleanolic<br>acid methyl ester | 131751417      | 630.00                    | 8.906134   | 0               | 5                  | 175.970               |
| Podorhizol beta-D-glucoside                      | 443015         | 578.00                    | 0.330600   | 4               | 13                 | 137.899               |
| RU 5135                                          | 656742         | 304.00                    | 2.288500   | 3               | 4                  | 85.427                |
| Soraphen A                                       | 5281897        | 520.00                    | 3.802699   | 2               | 8                  | 138.595               |
| Carbenicillin                                    | 20824          | 378.00                    | 0.486500   | 3               | 8                  | 92.477                |
| Beta-Obscurine                                   | 5460546        | 272.0                     | 2.456900   | 1               | 3                  | 78.898                |
| Gentisic acid                                    | 3469           | 154.0                     | 0.796000   | 3               | 4                  | 36.730                |
| Quinic acid                                      | 6508           | 192.0                     | -2.321400  | 5               | 6                  | 39.839                |
| Vanillin                                         | 1183           | 152.0                     | 1.213300   | 1               | 3                  | 40.046                |
| Albendazole                                      | 2082           | 265.00                    | 3.243299   | 2               | 4                  | 73.136                |
| DEC                                              | 3052           | 199.00                    | 0.695600   | 0               | 4                  | 57.386                |

Table 5. Showing the interacting residue common in active site and ligand and protein complex involved in H-bonding

| Receptor | S.N.          | Drug Name<br>(PubChem CID)                                                                                                                                                                                                                                                                                                                        | Interacting residue                                                                                                                                                                                                                                                                                                                                  | receptor                                                                                                                                                                              | Ligand atom involved in H-bonding                                                                                                                                                                                                                                                                                    | Protein |
|----------|---------------|---------------------------------------------------------------------------------------------------------------------------------------------------------------------------------------------------------------------------------------------------------------------------------------------------------------------------------------------------|------------------------------------------------------------------------------------------------------------------------------------------------------------------------------------------------------------------------------------------------------------------------------------------------------------------------------------------------------|---------------------------------------------------------------------------------------------------------------------------------------------------------------------------------------|----------------------------------------------------------------------------------------------------------------------------------------------------------------------------------------------------------------------------------------------------------------------------------------------------------------------|---------|
| GPx      | 1             | 3-O-Methylquercetin                                                                                                                                                                                                                                                                                                                               | THR <sup>15</sup> , VAL <sup>16</sup> , LYS <sup>17</sup> , ASP <sup>23</sup> , SER <sup>102</sup> , LYS <sup>103</sup> , ILE <sup>104</sup> , LYS <sup>105</sup> , ASP <sup>110</sup> , ALA <sup>111</sup> , ASP <sup>112</sup>                                                                                                                     |                                                                                                                                                                                       | LYS <sup>17</sup> :H - LIGAND:O4<br>LYS <sup>105</sup> :H - LIGAND:O6                                                                                                                                                                                                                                                |         |
|          | 2             | 4-Methoxycinnamoyloleonic acid methyl ester                                                                                                                                                                                                                                                                                                       | GLN <sup>74</sup> , PHE <sup>75</sup> , LYS <sup>105</sup> , ASN <sup>107</sup> , GLY <sup>108</sup> , THR <sup>127</sup> , ASN <sup>129</sup> , ILE <sup>130</sup> , LYS <sup>131</sup> , TRP <sup>132</sup> , PRO <sup>151</sup> , THR <sup>152</sup>                                                                                              |                                                                                                                                                                                       | GLN <sup>74</sup> :HE22 - LIGAND:O6                                                                                                                                                                                                                                                                                  |         |
|          | 3             | Albendazole                                                                                                                                                                                                                                                                                                                                       | SER <sup>7</sup> , TRP <sup>8</sup> , GLY <sup>108</sup> , SER <sup>109</sup> , LYS <sup>116</sup> , PHE <sup>117</sup> , LYS <sup>119</sup> , SER <sup>120</sup> , ASN <sup>128</sup> , ASN <sup>129</sup>                                                                                                                                          |                                                                                                                                                                                       | LYS <sup>119</sup> :HZ1 - LIGAND:O2                                                                                                                                                                                                                                                                                  |         |
|          | 4             | DEC                                                                                                                                                                                                                                                                                                                                               | ASP <sup>18</sup> , ILE <sup>19</sup> , ASN <sup>20</sup> , LYS <sup>87</sup> , VAL <sup>90</sup> , THR <sup>91</sup> , VAL <sup>96</sup> , GLN <sup>97</sup> , PHE <sup>98</sup> , ASP <sup>99</sup> , MET <sup>100</sup>                                                                                                                           |                                                                                                                                                                                       | MET <sup>100</sup> :H - LIGAND:O1                                                                                                                                                                                                                                                                                    |         |
|          | 5             | Podorhizol beta-D-glucoside                                                                                                                                                                                                                                                                                                                       | LYS <sup>48</sup> , ARG <sup>51</sup> , GLN <sup>52</sup> , GLN <sup>54</sup> , GLU <sup>55</sup> , THR <sup>58</sup> , LYS <sup>93</sup> , TYR <sup>94</sup> , GLY <sup>95</sup> , TYR <sup>156</sup>                                                                                                                                               |                                                                                                                                                                                       | NA                                                                                                                                                                                                                                                                                                                   |         |
|          | 6             | RU 5135                                                                                                                                                                                                                                                                                                                                           | SER <sup>7</sup> , TRP <sup>8</sup> , LYS <sup>116</sup> , PHE <sup>117</sup> , SER <sup>120</sup> , ARG <sup>121</sup>                                                                                                                                                                                                                              |                                                                                                                                                                                       | SER <sup>7</sup> :HZ - LIGAND:O1<br>SER <sup>120</sup> :HG - LIGAND:O2                                                                                                                                                                                                                                               |         |
|          | 7             | Soraphen A                                                                                                                                                                                                                                                                                                                                        | ASP <sup>18</sup> , ILE <sup>19</sup> , ASN <sup>20</sup> , LYS <sup>28</sup> , LYS <sup>87</sup> , THR <sup>91</sup> , VAL <sup>96</sup> , GLN <sup>97</sup> , PHE <sup>98</sup> , ASP <sup>99</sup> , MET <sup>100</sup>                                                                                                                           |                                                                                                                                                                                       | ASN <sup>20</sup> :HD21 - LIGAND:O7<br>LYS <sup>87</sup> :HZ3 - LIGAND:O7<br>LIGAND:H36 - GLN <sup>97</sup> :O<br>LIGAND:H42 - GLN <sup>97</sup> :OE1                                                                                                                                                                |         |
|          | 8             | Vanillin                                                                                                                                                                                                                                                                                                                                          | HIS <sup>123</sup> , GLY <sup>124</sup> , THR <sup>125</sup> , ILE <sup>130</sup> , LYS <sup>131</sup> , TRP <sup>132</sup> , SER <sup>135</sup> , ARG <sup>148</sup> , TYR <sup>149</sup> , SER <sup>150</sup> , PRO <sup>151</sup>                                                                                                                 |                                                                                                                                                                                       | ARG <sup>148</sup> :HE - LIGAND:O3<br>ARG <sup>148</sup> :HE21 - LIGAND:O3                                                                                                                                                                                                                                           |         |
|          | 9             | Gentisic acid                                                                                                                                                                                                                                                                                                                                     | HIS <sup>123</sup> , GLY <sup>124</sup> , THR <sup>125</sup> , LYS <sup>131</sup> , ARG <sup>148</sup> , SER <sup>150</sup> , PRO <sup>151</sup>                                                                                                                                                                                                     |                                                                                                                                                                                       | THR <sup>125</sup> :H - LIGAND:O3<br>LYS <sup>131</sup> :HZ3 - LIGAND:O3<br>ARG <sup>148</sup> :HE - LIGAND:O4<br>ARG <sup>148</sup> :HE21 - LIGAND:O4<br>LIGAND:H17 - THR <sup>125</sup> :OG1                                                                                                                       |         |
|          | 10            | Quinic acid                                                                                                                                                                                                                                                                                                                                       | GLY <sup>124</sup> , THR <sup>125</sup> , ASN <sup>129</sup> , ILE <sup>130</sup> , LYS <sup>131</sup> , TRP <sup>132</sup> , SER <sup>135</sup> , LYS <sup>136</sup> , ARG <sup>148</sup> , TYR <sup>149</sup> , SER <sup>150</sup> , PRO <sup>151</sup>                                                                                            |                                                                                                                                                                                       | THR <sup>125</sup> :HG1 - LIGAND:O3<br>THR <sup>125</sup> :HG1 - LIGAND:O4<br>LYS <sup>131</sup> :H - LIGAND:O6<br>LYS <sup>131</sup> :HZ2 - LIGAND:O1<br>ARG <sup>148</sup> :HH21 - LIGAND:O1<br>LIGAND:H23 - THR <sup>125</sup> :OG1<br>LIGAND:H24 - THR <sup>125</sup> :OG1<br>LIGAND:H25 - TYR <sup>149</sup> :O |         |
|          | 11            | Beta-Obscurine                                                                                                                                                                                                                                                                                                                                    | HIS <sup>97</sup> , GLN <sup>99</sup> , ASP <sup>100</sup> , ILE <sup>101</sup> , ILE <sup>134</sup> , PRO <sup>137</sup> , GLY <sup>138</sup> , LYS <sup>140</sup> , ASP <sup>163</sup> , ASP <sup>164</sup> , VAL <sup>165</sup> , PHE <sup>166</sup> , HIS <sup>168</sup>                                                                         |                                                                                                                                                                                       | LYS <sup>140</sup> :HZ2 - LIGAND:O2<br>ASP <sup>164</sup> :H - LIGAND:O1<br>ASP <sup>164</sup> :H - LIGAND:O2<br>LIGAND:H22 - ASP <sup>164</sup> :OD1                                                                                                                                                                |         |
| 12       | Carbenicillin | PHE <sup>12</sup> , SER <sup>13</sup> , VAL <sup>15</sup> , SER <sup>16</sup> , ALA <sup>17</sup> , VAL <sup>19</sup> , TYR <sup>20</sup> , PHE <sup>21</sup> , LYS <sup>22</sup> , GLU <sup>23</sup> , GLU <sup>24</sup> , ARG <sup>33</sup> , TRP <sup>34</sup> , ALA <sup>76</sup> , LYS <sup>77</sup> , PHE <sup>78</sup> , GLU <sup>79</sup> |                                                                                                                                                                                                                                                                                                                                                      | LYS <sup>22</sup> :H - LIGAND:O4<br>LYS <sup>77</sup> :H - LIGAND:O4<br>LIGAND:H39 - GLU <sup>23</sup> :OE1<br>LIGAND:H40 - LYS <sup>77</sup> :O<br>LIGAND:H41 - LYS <sup>12</sup> :O |                                                                                                                                                                                                                                                                                                                      |         |
| GST      | 1             | 3-O-Methylquercetin                                                                                                                                                                                                                                                                                                                               | ARG <sup>11</sup> , ASP <sup>159</sup> , GLN <sup>162</sup> , ILE <sup>163</sup> , HIS <sup>179</sup> , GLU <sup>183</sup> , ARG <sup>195</sup> , ASN <sup>196</sup> , LYS <sup>199</sup> , ILE <sup>200</sup> , GLN <sup>208</sup>                                                                                                                  |                                                                                                                                                                                       | HIS <sup>179</sup> :HE2 - LIGAND:O7<br>GLN <sup>208</sup> :HE21 - LIGAND:O3<br>LIGAND:H34 - ASP <sup>159</sup> :OD1                                                                                                                                                                                                  |         |
|          | 2             | 4-Methoxycinnamoyloleonic acid methyl ester                                                                                                                                                                                                                                                                                                       | TYR <sup>7</sup> , PHE <sup>8</sup> , PRO <sup>9</sup> , ILE <sup>10</sup> , LEU <sup>13</sup> , ASN <sup>34</sup> , ALA <sup>35</sup> , TRP <sup>38</sup> , GLN <sup>49</sup> , LEU <sup>50</sup> , HIS <sup>98</sup> , THR <sup>102</sup> , TYR <sup>106</sup> , LYS <sup>199</sup> , PRO <sup>201</sup> , GLY <sup>204</sup> , ASN <sup>205</sup> |                                                                                                                                                                                       | ALA <sup>35</sup> :H - LIGAND:O4<br>GLN <sup>49</sup> :HE21 - LIGAND:O3                                                                                                                                                                                                                                              |         |



|     |    |                                               |                                                                                                                                                                                                                                                                                                                                                                                                                                                                                |
|-----|----|-----------------------------------------------|--------------------------------------------------------------------------------------------------------------------------------------------------------------------------------------------------------------------------------------------------------------------------------------------------------------------------------------------------------------------------------------------------------------------------------------------------------------------------------|
|     | 3  | Albendazole                                   | ARG <sup>11</sup> , ASP <sup>159</sup> , ILE <sup>163</sup> , GLU <sup>183</sup> , ARG <sup>195</sup> :HH21- LIGAND:O3<br>LYS <sup>189</sup> , CYS <sup>192</sup> , LYS <sup>193</sup> ,<br>ARG <sup>195</sup> , ASN <sup>196</sup>                                                                                                                                                                                                                                            |
|     | 4  | DEC                                           | TYR <sup>7</sup> , PHE <sup>8</sup> , ILE <sup>10</sup> , GLY <sup>12</sup> , TYR <sup>106</sup> :HH - LIGAND:O1<br>LEU <sup>13</sup> , GLN <sup>49</sup> , LEU <sup>50</sup> , HIS <sup>98</sup> ,<br>THR <sup>102</sup> , TYR <sup>106</sup> , VAL <sup>202</sup> ,<br>ASN <sup>203</sup> , GLY <sup>204</sup>                                                                                                                                                               |
|     | 5  | Podorhizol beta-D-glucoside                   | TYR <sup>7</sup> , PHE <sup>8</sup> , PRO <sup>9</sup> , ILE <sup>10</sup> , TYR <sup>7</sup> :HH - LIGAND:O2<br>LEU <sup>13</sup> , ALA <sup>35</sup> , GLN <sup>49</sup> , LEU <sup>50</sup> , LEU <sup>50</sup> :H - LIGAND:O5<br>THR <sup>102</sup> , LYS <sup>103</sup> , TYR <sup>106</sup> , TYR <sup>106</sup> :HH - LIGAND:O7<br>GLY <sup>204</sup> LIGAND:H60 – GLN <sup>59</sup> :OE1                                                                               |
|     | 6  | RU 5135                                       | TYR <sup>7</sup> , PHE <sup>8</sup> , PRO <sup>9</sup> , ILE <sup>10</sup> ,<br>LEU <sup>13</sup> , ALA <sup>35</sup> , GLN <sup>49</sup> , LEU <sup>50</sup> ,<br>TYR <sup>106</sup> , GLY <sup>204</sup><br>NA                                                                                                                                                                                                                                                               |
|     | 7  | Soraphen A                                    | ARG <sup>11</sup> , ASP <sup>159</sup> , GLN <sup>162</sup> , ILE <sup>163</sup> , ARG <sup>11</sup> :HH11 - LIGAND:O5<br>HIS <sup>179</sup> , GLU <sup>183</sup> , CYS <sup>192</sup> , ARG <sup>11</sup> :HH12 - LIGAND:O8<br>ARG <sup>195</sup> , ASN <sup>196</sup> , LYS <sup>199</sup> , ARG <sup>195</sup> :HH21 - LIGAND:O9<br>ILE <sup>200</sup> , VAL <sup>202</sup> , GLN <sup>208</sup> GLN <sup>208</sup> :HE43 - LIGAND:O6<br>LIGAND:H43 – CYS <sup>192</sup> :O |
|     | 8  | Vanillin                                      | ARG <sup>11</sup> , ASP <sup>159</sup> , ILE <sup>163</sup> , CYS <sup>192</sup> , ARG <sup>195</sup> , ASN <sup>196</sup> , LYS <sup>199</sup> , ILE <sup>200</sup> , GLN <sup>208</sup><br>ILU <sup>200</sup> :H - LIGAND:O2<br>LIGAND:H19 – ARG <sup>195</sup> :O                                                                                                                                                                                                           |
|     | 9  | Gentisic acid                                 | GLY <sup>12</sup> , LEU <sup>13</sup> , PRO <sup>16</sup> , SER <sup>63</sup> , LIGAND:H15 – LUE <sup>13</sup> :O<br>GLY <sup>64</sup> , LEU <sup>67</sup> , CYS <sup>91</sup> , VAL <sup>94</sup> , LIGAND:H16– GLU <sup>157</sup> :OE1<br>ARG <sup>95</sup> , HIS <sup>98</sup> , VAL <sup>153</sup> , GLU <sup>156</sup> ,<br>GLU <sup>157</sup>                                                                                                                            |
|     | 10 | Quinic acid                                   | GLY <sup>12</sup> , LEU <sup>13</sup> , GLU <sup>15</sup> , PRO <sup>16</sup> , LIGAND:H24– GLU <sup>157</sup> :OE1<br>SER <sup>63</sup> , LEU <sup>67</sup> , CYS <sup>91</sup> , VAL <sup>94</sup> ,<br>ARG <sup>95</sup> , HIS <sup>98</sup> , VAL <sup>153</sup> , GLU <sup>156</sup> ,<br>GLU <sup>157</sup> , ILE <sup>160</sup>                                                                                                                                         |
|     | 11 | Beta-Obscurine                                | ASN <sup>9</sup> , GLY <sup>10</sup> , PHE <sup>11</sup> , ASN <sup>34</sup> , LIGAND:H30 – ASN <sup>34</sup> :O<br>ASP <sup>35</sup> , PRO <sup>36</sup> , PHE <sup>37</sup> , ILE <sup>38</sup> ,<br>MET <sup>46</sup> , SER <sup>83</sup> , LYS <sup>84</sup> , ILE <sup>89</sup> ,<br>THR <sup>103</sup> , VAL <sup>105</sup> , PHE <sup>106</sup>                                                                                                                         |
|     | 12 | Carbenicillin                                 | ASN <sup>9</sup> , GLY <sup>10</sup> , PHE <sup>11</sup> , GLY <sup>12</sup> , LIGAND:H39 – SER <sup>83</sup> :O<br>ASN <sup>34</sup> , ASP <sup>35</sup> , PRO <sup>36</sup> , PHE <sup>37</sup> , LIGAND:H33 – ILE <sup>108</sup> :O<br>ILE <sup>38</sup> , SER <sup>83</sup> , LYS <sup>84</sup> , PRO <sup>86</sup> ,<br>ILE <sup>89</sup> , SER <sup>102</sup> , THR <sup>103</sup> , VAL <sup>105</sup> ,<br>PHE <sup>106</sup>                                          |
| SOD | 1  | 3-O-Methylquercetin                           | ILE <sup>108</sup> , SER <sup>111</sup> , GLY <sup>112</sup> , LIGAND:H42 – ASP <sup>35</sup> :OD2<br>GLU <sup>113</sup> , PRO <sup>114</sup> , LEU <sup>129</sup> ,<br>GLU <sup>130</sup> , GLU <sup>133</sup> , LYS <sup>203</sup> ,<br>TRP <sup>206</sup> , LYS <sup>207</sup> , TRP <sup>211</sup>                                                                                                                                                                         |
|     | 2  | 4-Methoxycinnamoyloleanolic acid methyl ester | HIS <sup>54</sup> , ALA <sup>57</sup> , TYR <sup>58</sup> , ALA <sup>61</sup> , NA<br>LYS <sup>68</sup> , VAL <sup>69</sup> , ALA <sup>72</sup> , ALA <sup>80</sup> ,<br>VAL <sup>81</sup> , ALA <sup>83</sup> , ALA <sup>84</sup> , LYS <sup>86</sup> ,<br>LEU <sup>87</sup> , PHE <sup>90</sup> , ASN <sup>91</sup> , GLN <sup>168</sup> ,<br>HIS <sup>188</sup>                                                                                                             |
|     | 3  | Albendazole                                   | ILE <sup>108</sup> , SER <sup>111</sup> , GLY <sup>112</sup> , LIGAND:H20 – GLU <sup>133</sup> :OE1<br>GLU <sup>113</sup> , GLU <sup>133</sup> , ASP <sup>134</sup> , LIGAND:H30 – GLU <sup>133</sup> :OE2<br>LYS <sup>203</sup> , TRP <sup>206</sup> , LYS <sup>207</sup> ,<br>TRP <sup>211</sup>                                                                                                                                                                             |
|     | 4  | DEC                                           | GLU <sup>117</sup> , SER <sup>120</sup> , ALA <sup>121</sup> , NA<br>LYS <sup>124</sup> , ASP <sup>125</sup> , TYR <sup>153</sup> ,<br>LYS <sup>158</sup> , ARG <sup>159</sup> , LEU <sup>160</sup> ,<br>TYR <sup>218</sup> , LYS <sup>222</sup>                                                                                                                                                                                                                               |
|     | 5  | Beta-Obscurine                                | ILE <sup>96</sup> , LEU <sup>100</sup> , LYS <sup>155</sup> , ILE <sup>178</sup> , NA<br>PRO <sup>179</sup> , LEU <sup>180</sup> , ARG <sup>217</sup> ,<br>LYS <sup>220</sup> , ALA <sup>221</sup>                                                                                                                                                                                                                                                                             |
|     | 6  | RU 5135                                       | LEU <sup>100</sup> , GLU <sup>103</sup> , LYS <sup>155</sup> , ARG <sup>217</sup> :HE - LIGAND:O2<br>GLN <sup>172</sup> , ILE <sup>178</sup> , PRO <sup>179</sup> , LIGAND:H50 – LYS <sup>220</sup> :O<br>LEU <sup>180</sup> , ARG <sup>217</sup> , LYS <sup>220</sup> ,                                                                                                                                                                                                       |

|     |    |                                               |                                                                                                                                                                                                                                                                                                                                                                                            |                                                                                                                                                                                                                                                                          |
|-----|----|-----------------------------------------------|--------------------------------------------------------------------------------------------------------------------------------------------------------------------------------------------------------------------------------------------------------------------------------------------------------------------------------------------------------------------------------------------|--------------------------------------------------------------------------------------------------------------------------------------------------------------------------------------------------------------------------------------------------------------------------|
|     | 7  | Carbenicillin                                 | ALA <sup>221</sup> , GLY <sup>223</sup><br>ILE <sup>108</sup> , SER <sup>111</sup> , GLU <sup>133</sup><br>ASP <sup>134</sup> , SER <sup>137</sup> , LYS <sup>203</sup><br>TRP <sup>206</sup> , LYS <sup>207</sup> , ALA <sup>209</sup><br>TRP <sup>211</sup>                                                                                                                              | LIGAND:H38 – LYS <sup>207</sup> :O                                                                                                                                                                                                                                       |
|     | 8  | Vanillin                                      | LEU <sup>21</sup> , ARG <sup>22</sup> , GLN <sup>23</sup> , LEU <sup>24</sup><br>GLU <sup>66</sup> , VAL <sup>69</sup> , LYS <sup>70</sup> , LEU <sup>73</sup> ,<br>MET <sup>88</sup>                                                                                                                                                                                                      | NA                                                                                                                                                                                                                                                                       |
|     | 9  | Gentisic acid                                 | LEU <sup>21</sup> , ARG <sup>22</sup> , GLN <sup>23</sup> , LEU <sup>24</sup><br>HIS <sup>26</sup> , GLU <sup>66</sup> , VAL <sup>69</sup> , LYS <sup>70</sup> ,<br>LEU <sup>73</sup>                                                                                                                                                                                                      | LUE <sup>24</sup> :H - LIGAND:O4<br>LIGAND:H15 – ARG <sup>22</sup> :O                                                                                                                                                                                                    |
|     | 10 | Quinic acid                                   | ILE <sup>108</sup> , LYS <sup>109</sup> , SER <sup>111</sup><br>GLY <sup>112</sup> , GLU <sup>113</sup> , GLU <sup>133</sup><br>TRP <sup>206</sup> , LYS <sup>207</sup> , ALA <sup>209</sup> ,<br>TRP <sup>211</sup>                                                                                                                                                                       | TYR <sup>211</sup> :HE1 - LIGAND:O6<br>LIGAND:H21 – TRP <sup>206</sup> :O<br>LIGAND:H22 – GLY <sup>112</sup> :O<br>LIGAND:H23 – LYS <sup>207</sup> :O                                                                                                                    |
|     | 11 | Podorhizol beta-D-glucoside                   | GLY <sup>27</sup> , PRO <sup>28</sup> , PHE <sup>129</sup><br>ASP <sup>131</sup> , VAL <sup>132</sup> , SER <sup>133</sup><br>LEU <sup>137</sup> , LEU <sup>162</sup> , TYR <sup>165</sup><br>ILE <sup>166</sup> , THR <sup>169</sup> , ALA <sup>170</sup> ,<br>VAL <sup>173</sup> , LYS <sup>184</sup>                                                                                    | NA                                                                                                                                                                                                                                                                       |
|     | 12 | Soraphen A                                    | PRO <sup>28</sup> , SER <sup>30</sup> , GLY <sup>31</sup> , LYS <sup>32</sup><br>GLY <sup>33</sup> , THR <sup>34</sup> , SER <sup>49</sup> , GLY <sup>51</sup> ,<br>ASP <sup>105</sup> , TYR <sup>107</sup> , ARG <sup>140</sup> ,<br>ARG <sup>144</sup> , THR <sup>147</sup> , SER <sup>148</sup> ,                                                                                       | GLY <sup>31</sup> :H - LIGAND:O4<br>GLY <sup>33</sup> :H - LIGAND:O2<br>ARG <sup>140</sup> :HH11 - LIGAND:O3                                                                                                                                                             |
| TRx | 1  | 3-O-Methylquercetin                           | LYS <sup>12</sup> , LYS <sup>18</sup> , ASP <sup>22</sup> , ALA <sup>23</sup><br>LEU <sup>24</sup> , ALA <sup>25</sup> , LYS <sup>27</sup> , TYR <sup>53</sup><br>ASP <sup>57</sup> , ASP <sup>58</sup> , ASP <sup>59</sup> , PHE <sup>61</sup> ,<br>GLU <sup>62</sup> , ASP <sup>85</sup> , TRP <sup>86</sup> , TYR <sup>87</sup>                                                         | LYS <sup>12</sup> :HZ3 - LIGAND:O4<br>LYS <sup>27</sup> :HZ1 - LIGAND:O1<br>TYR <sup>87</sup> :HH - LIGAND:O2<br>LIGAND:H29 – TYR <sup>53</sup> :OH<br>LIGAND:H34 – ASP <sup>58</sup> :O<br>LIGAND:H34 – ASP <sup>22</sup> :O<br>LIGAND:H34 – ALA <sup>23</sup> :O       |
|     | 2  | 4-Methoxycinnamoyloleanolic acid methyl ester | TRP <sup>38</sup> , CYS <sup>39</sup> , PRO <sup>40</sup> , PRO <sup>41</sup> ,<br>GLN <sup>44</sup> , PHE <sup>45</sup> , ILE <sup>48</sup> , LEU <sup>68</sup> ,<br>HIS <sup>70</sup> , ALA <sup>106</sup> , GLY <sup>107</sup> , ILE <sup>108</sup> ,<br>PRO <sup>109</sup> , ARG <sup>126</sup> , SER <sup>130</sup> ,<br>LYS <sup>132</sup> , PRO <sup>134</sup> , PRO <sup>135</sup> | NA                                                                                                                                                                                                                                                                       |
|     | 3  | Albendazole                                   | LYS <sup>12</sup> , LYS <sup>18</sup> , ASP <sup>22</sup> , ALA <sup>23</sup><br>ALA <sup>25</sup> , LYS <sup>27</sup> , TYR <sup>53</sup> , GLU <sup>54</sup> ,<br>ASP <sup>57</sup> , ASP <sup>58</sup> , ASP <sup>59</sup> , GLU <sup>62</sup> ,<br>ASP <sup>85</sup> , TYR <sup>87</sup>                                                                                               | LYS <sup>27</sup> :HZ1 - LIGAND:O3<br>LYS <sup>27</sup> :HZ1 - LIGAND:N5                                                                                                                                                                                                 |
|     | 4  | DEC                                           | LYS <sup>27</sup> , TYR <sup>53</sup> , GLU <sup>54</sup> , VAL <sup>56</sup> ,<br>ASP <sup>57</sup> , ASP <sup>58</sup> , ASP <sup>59</sup> , PHE <sup>61</sup> ,<br>ASP <sup>85</sup>                                                                                                                                                                                                    | NA                                                                                                                                                                                                                                                                       |
|     | 5  | Beta-Obscurine                                | LYS <sup>12</sup> , LYS <sup>27</sup> , TYR <sup>53</sup> , GLU <sup>54</sup> ,<br>ASP <sup>57</sup> , ASP <sup>58</sup> , ASP <sup>59</sup> , PHE <sup>61</sup> ,<br>GLU <sup>62</sup> , ASP <sup>85</sup> , TYR <sup>87</sup>                                                                                                                                                            | LYS <sup>12</sup> :HZ3 - LIGAND:O1<br>LIGAND:H43 – GLU <sup>62</sup> :OE2                                                                                                                                                                                                |
|     | 6  | Carbenicillin                                 | LYS <sup>12</sup> , ASP <sup>22</sup> , ALA <sup>23</sup> , ALA <sup>25</sup> ,<br>ASN <sup>26</sup> , LYS <sup>27</sup> , TYR <sup>53</sup> , GLU <sup>54</sup> ,<br>ASP <sup>57</sup> , ASP <sup>58</sup> , ASP <sup>59</sup> , PHE <sup>61</sup> ,<br>GLU <sup>62</sup> , ASP <sup>85</sup> , TYR <sup>87</sup>                                                                         | LYS <sup>27</sup> :HZ3 - LIGAND:O1<br>TYR <sup>87</sup> :HH - LIGAND:O2<br>LIGAND:H43 – ASP <sup>58</sup> :O                                                                                                                                                             |
|     | 7  | RU 5135                                       | LYS <sup>28</sup> , VAL <sup>29</sup> , ALA <sup>31</sup> , PHE <sup>52</sup> ,<br>VAL <sup>56</sup> , ASP <sup>58</sup> , GLN <sup>60</sup> , PHE <sup>61</sup> ,<br>LEU <sup>111</sup> , VAL <sup>113</sup> , ILE <sup>121</sup> ,<br>VAL <sup>129</sup>                                                                                                                                 | NA                                                                                                                                                                                                                                                                       |
|     | 8  | Soraphen A                                    | LYS <sup>12</sup> , ALA <sup>23</sup> , LYS <sup>27</sup> , TYR <sup>53</sup> ,<br>GLU <sup>54</sup> , VAL <sup>56</sup> , ASP <sup>57</sup> , ASP <sup>58</sup> ,<br>ASP <sup>59</sup> , PHE <sup>61</sup> , GLU <sup>62</sup> , ASP <sup>85</sup> ,<br>TYR <sup>87</sup>                                                                                                                 | LYS <sup>27</sup> :HZ1 - LIGAND:O2<br>LYS <sup>27</sup> :HZ1 - LIGAND:O4<br>TYR <sup>87</sup> :HH - LIGAND:O5<br>LIGAND:HH33 – GLU <sup>62</sup> :OE2<br>LIGAND:HH36 – TYR <sup>87</sup> :OH<br>LIGAND:HH43 – ASP <sup>51</sup> :O<br>LIGAND:HH33 – PHE <sup>61</sup> :O |
|     | 9  | Vanillin                                      | LYS <sup>27</sup> , TYR <sup>53</sup> , GLU <sup>54</sup> , VAL <sup>56</sup> ,<br>ASP <sup>57</sup> , ASP <sup>58</sup> , ASP <sup>59</sup> , PHE <sup>61</sup> ,                                                                                                                                                                                                                         | ASP <sup>58</sup> :H - LIGAND:O1                                                                                                                                                                                                                                         |

|    |                             |                                                                                                                                                                                                                                                                                                                                                                                                                                                                                  |                                                                                                                                                          |
|----|-----------------------------|----------------------------------------------------------------------------------------------------------------------------------------------------------------------------------------------------------------------------------------------------------------------------------------------------------------------------------------------------------------------------------------------------------------------------------------------------------------------------------|----------------------------------------------------------------------------------------------------------------------------------------------------------|
| 10 | Gentisic acid               | GLU <sup>62</sup><br>LYS <sup>27</sup> , TYR <sup>53</sup> , GLU <sup>54</sup> , VAL <sup>56</sup><br>ASP <sup>57</sup> , ASP <sup>58</sup> , ASP <sup>59</sup> , PHE <sup>61</sup> ,<br>GLU <sup>62</sup>                                                                                                                                                                                                                                                                       | ASP <sup>58</sup> :H - LIGAND:O2<br>ASP <sup>58</sup> :H - LIGAND:O2                                                                                     |
| 11 | Quinic acid                 | LYS <sup>27</sup> , TYR <sup>53</sup> , GLU <sup>54</sup> , VAL <sup>56</sup> ,<br>ASP <sup>57</sup> , ASP <sup>58</sup> , ASP <sup>59</sup> , PHE <sup>61</sup> ,<br>GLU <sup>62</sup> , ASP <sup>85</sup>                                                                                                                                                                                                                                                                      | LYS <sup>27</sup> :HZ3 - LIGAND:O5<br>ASP <sup>58</sup> :H - LIGAND:O2<br>LIGAND:H25 - PHE <sup>61</sup> :O                                              |
| 12 | Podorhizol beta-D-glucoside | PRO <sup>28</sup> , GLY <sup>29</sup> , SER <sup>30</sup> , GLY <sup>31</sup> ,<br>LYS <sup>32</sup> , GLY <sup>33</sup> , THR <sup>34</sup> , ASP <sup>37</sup> ,<br>HIS <sup>47</sup> , SER <sup>49</sup> , GLY <sup>51</sup> , ASP <sup>52</sup> ,<br>ARG <sup>55</sup> , ASP <sup>105</sup> , TYR <sup>107</sup> ,<br>ARG <sup>140</sup> , HIS <sup>143</sup> , ARG <sup>144</sup> ,<br>SER <sup>148</sup> , GLY <sup>149</sup> , ARG <sup>150</sup> ,<br>ARG <sup>161</sup> | LYS <sup>32</sup> :HZ1 - LIGAND:O8<br>ARG <sup>55</sup> :HH12 - LIGAND:O10<br>ARG <sup>55</sup> :HH22 - LIGAND:O10<br>TYR <sup>107</sup> :HH - LIGAND:O8 |

---
